# Supplementary material for: Cathepsin B-Deficient Mice Resolve Leishmania major Inflammation Faster in a T Cell-Dependent Manner
Source: PubMed Central journal article supplement (PMC4868322; doi:10.1371/journal.pntd.0004716), 2016-05-16
Supplement: pntd.0004716.s001.pdf [file pntd.0004716.s001.pdf]

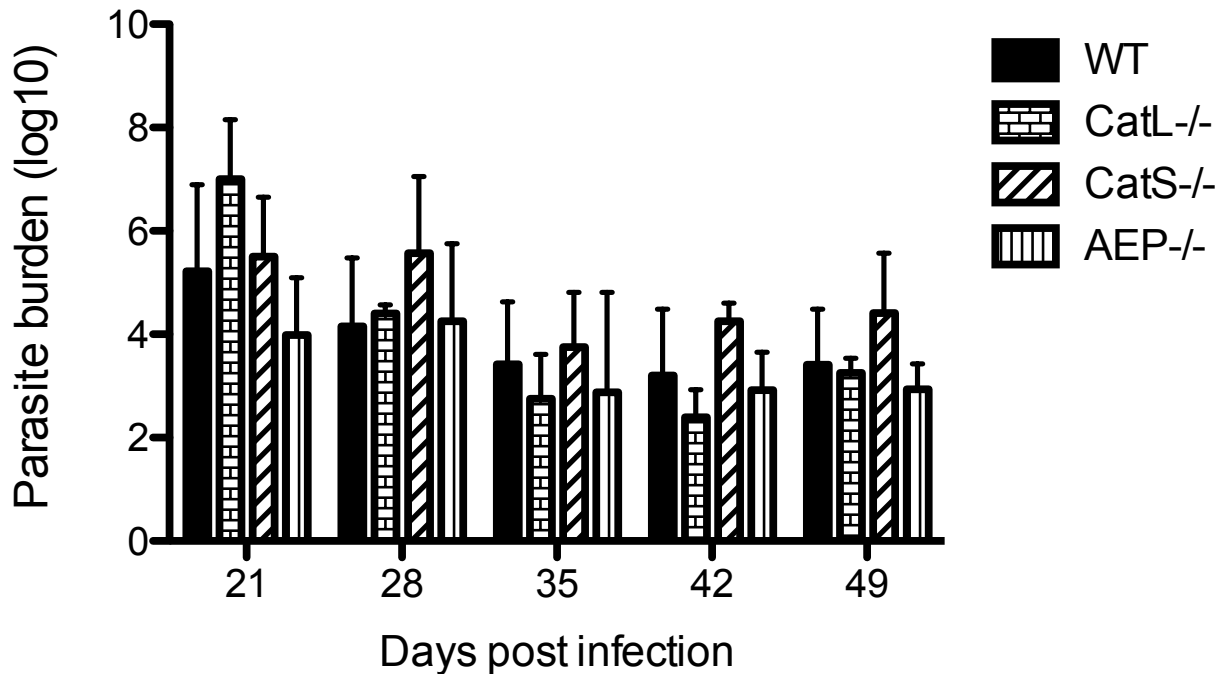

**Supplementary Figure 1. Parasite burdens of WT, CatL<sup>-/-</sup>, CatS<sup>-/-</sup> and AEP<sup>-/-</sup> mice**

WT, CatS<sup>-/-</sup>, CatL<sup>-/-</sup> and AEP<sup>-/-</sup> mice were subcutaneously inoculated with  $3 \times 10^6$  stationary phase promastigotes of *L. major* in the footpads and experimental read-outs were measured at indicated time-points. Logarithm base 10 of limit dilution for parasite burden from footpads of infected mice. Data are presented as mean+SD. n=3-7 mice per group/timepoint.
