# Supplementary material for: Cathepsin B-Deficient Mice Resolve Leishmania major Inflammation Faster in a T Cell-Dependent Manner
Source: PubMed Central journal article supplement (PMC4868322; doi:10.1371/journal.pntd.0004716), 2016-05-16
Supplement: pntd.0004716.s002.pdf [file pntd.0004716.s002.pdf]

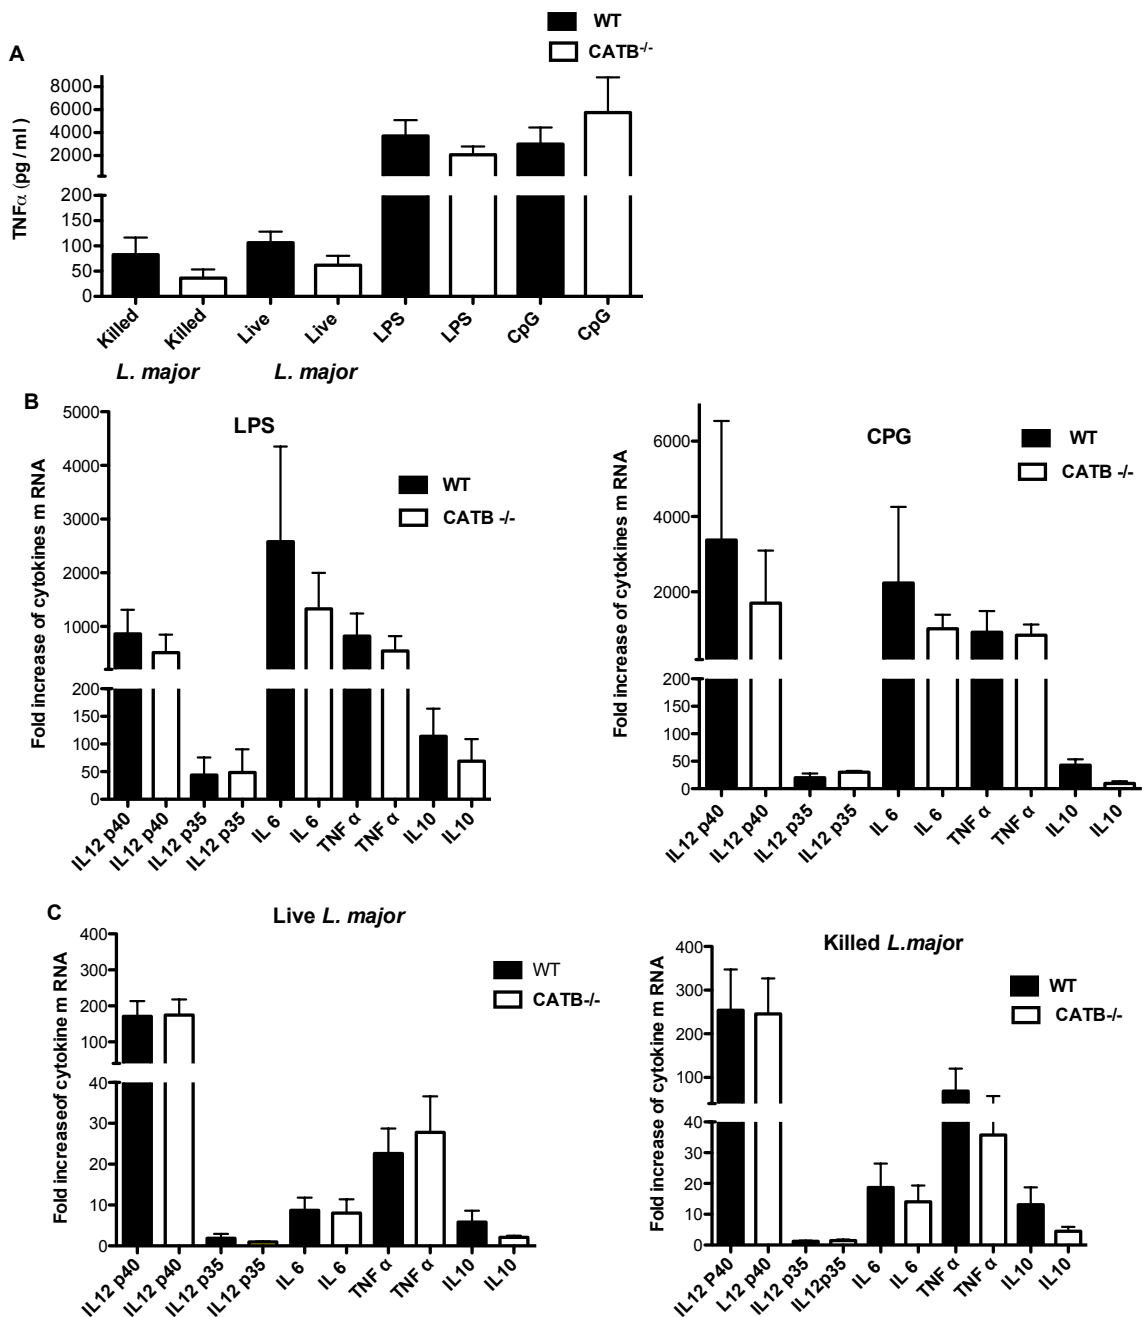

**Supplementary Figure 2:** CatB $^{-/-}$  and WT BMDMs respond similarly to LPS, CpG, killed or live *L. major*. BMDMs from WT and CatB $^{-/-}$  mice were stimulated with LPS (100ng/ml), CpG (250ng/ml), live or killed *L. major* promastigotes (1:5 MOI) to determine TNF $\alpha$  production by ELISA (A) and to assess cytokine mRNAs expression by RT PCR (B and C).
