# Supplementary material for: Cathepsin B-Deficient Mice Resolve Leishmania major Inflammation Faster in a T Cell-Dependent Manner
Source: PubMed Central journal article supplement (PMC4868322; doi:10.1371/journal.pntd.0004716), 2016-05-16
Supplement: pntd.0004716.s003.pdf [file pntd.0004716.s003.pdf]

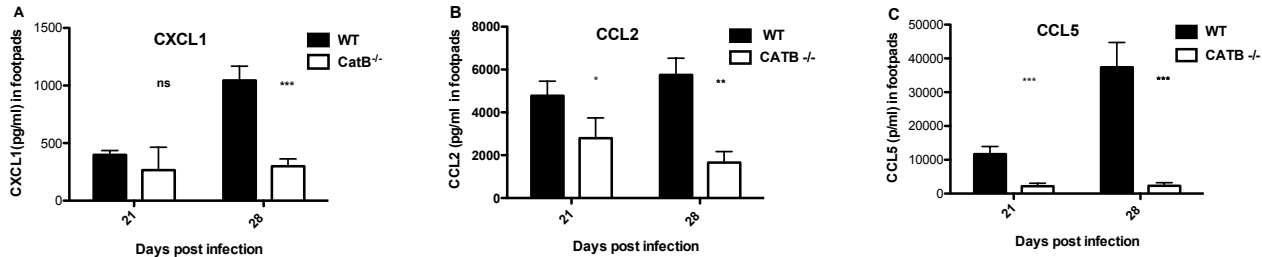

**Supplementary Figure 3:** Chemokines responses of *L. major* infected WT and CatB<sup>-/-</sup> mice.

WT and CatB<sup>-/-</sup> were inoculated subcutaneously in the footpads with  $3 \times 10^6$  stationary phase promastigotes of *L. major*. Footpads were harvested at day 21 and 28 post infection. Levels of CXCL1 (A), CCL2 (B) and CCL5 (C) were measured in the supernatants of footpads by ELISA.
