# Supplementary material for: Cathepsin B-Deficient Mice Resolve Leishmania major Inflammation Faster in a T Cell-Dependent Manner
Source: PubMed Central journal article supplement (PMC4868322; doi:10.1371/journal.pntd.0004716), 2016-05-16
Supplement: pntd.0004716.s004.pdf [file pntd.0004716.s004.pdf]

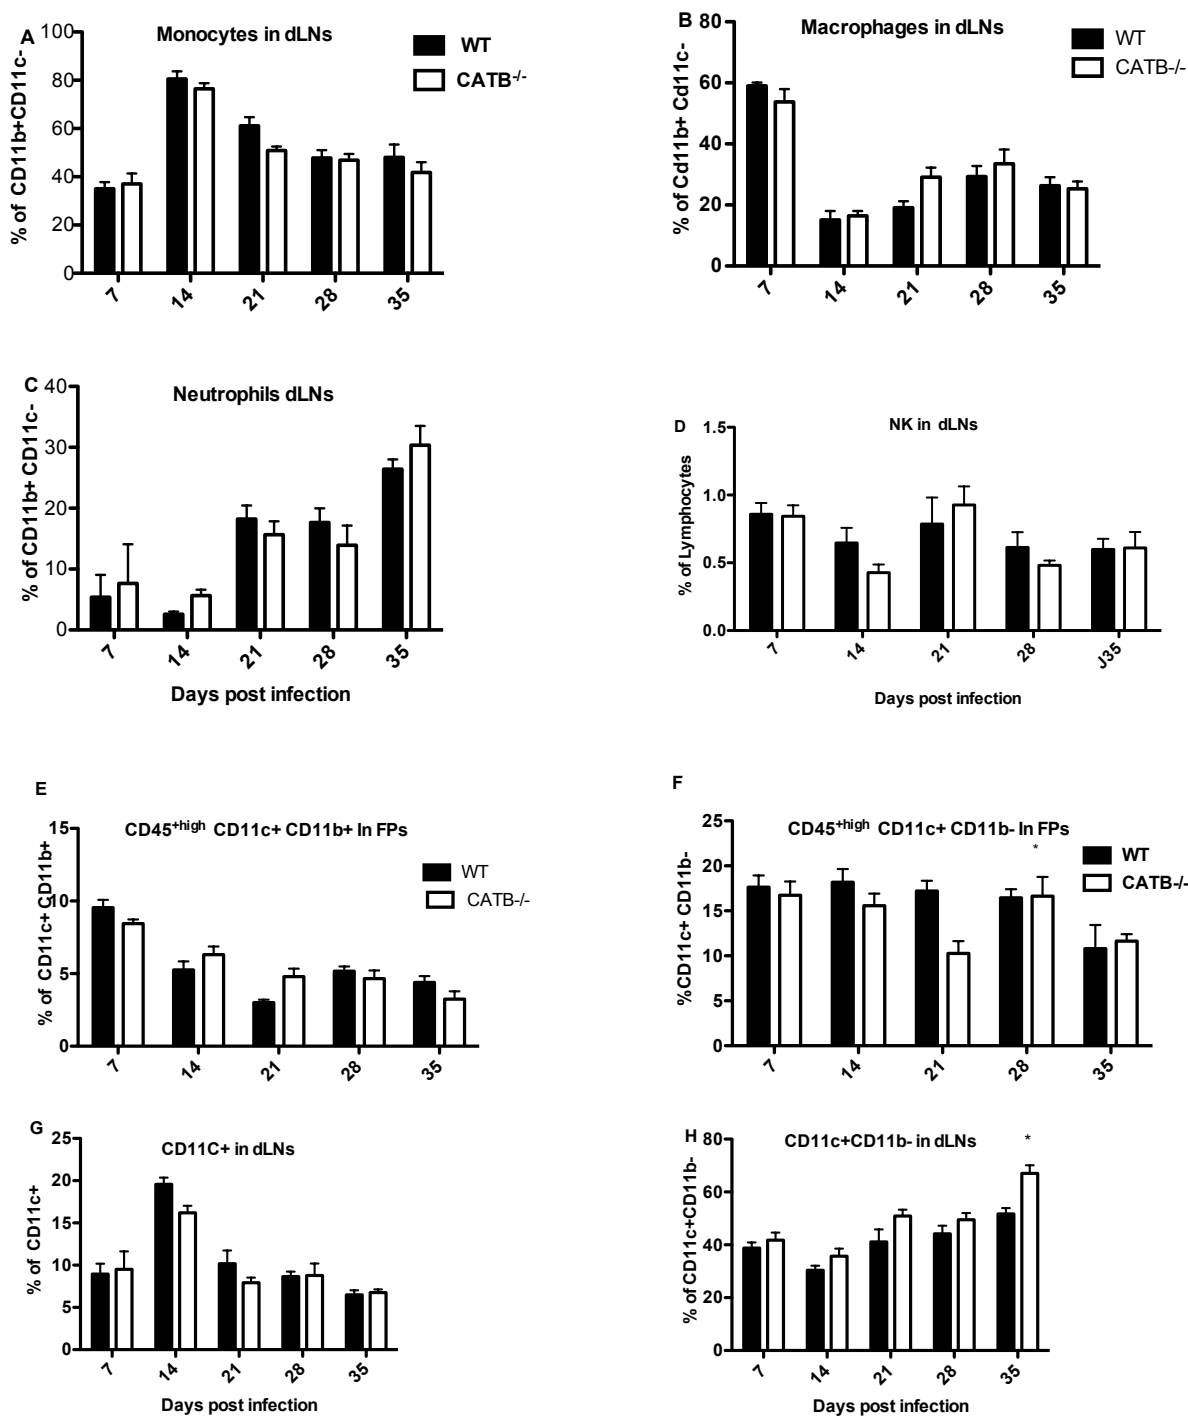

**Supplementary Figure 4:** Innate immune cells in lymphnodes (dLNs) or footpads (FPs) of *L. major* infected WT and CatB<sup>-/-</sup> mice which were harvested weekly as indicated. (A-C). Lymphnodes samples prepared from *L. major* -infected WT (filled bars) and CatB<sup>-/-</sup> (empty bars) mice. CD11b<sup>+</sup> CD11c<sup>-</sup> were gated on live events from lymphnodes single cell suspensions and FACS analysis of the percentage of (A) Ly6G<sup>-</sup>Ly6C<sup>high</sup> monocytes (B) Ly6G<sup>-</sup>Ly6C<sup>int</sup> macrophages and (C) Ly6G<sup>high</sup>Ly6C<sup>int</sup> neutrophils were performed, (D) NK were gated on lymphocytes. (E-F) In footpads (FPs) of *L. major* infected WT and CatB<sup>-/-</sup>, CD45<sup>+</sup> were gated on live events for facs analysis of DCs (E) CD11b<sup>+</sup>CD11c<sup>+</sup> and (F) CD11b<sup>+</sup>CD11c<sup>-</sup>. (H-G) In lymphnodes (dLNs) of *L. major* infected WT and CatB<sup>-/-</sup> DCs were gated on (G) CD11c<sup>+</sup> cells from myeloid cells and FACS analysis of the percentage of (H) CD11c<sup>+</sup>CD11b<sup>-</sup> -Data depicted represent the mean and SEM of at least 3 independent experiments with n ≥ 4 mice/group/time point. \* p<0.05;
