# Supplementary material for: Cathepsin B-Deficient Mice Resolve Leishmania major Inflammation Faster in a T Cell-Dependent Manner
Source: PubMed Central journal article supplement (PMC4868322; doi:10.1371/journal.pntd.0004716), 2016-05-16
Supplement: pntd.0004716.s005.pdf [file pntd.0004716.s005.pdf]

**A**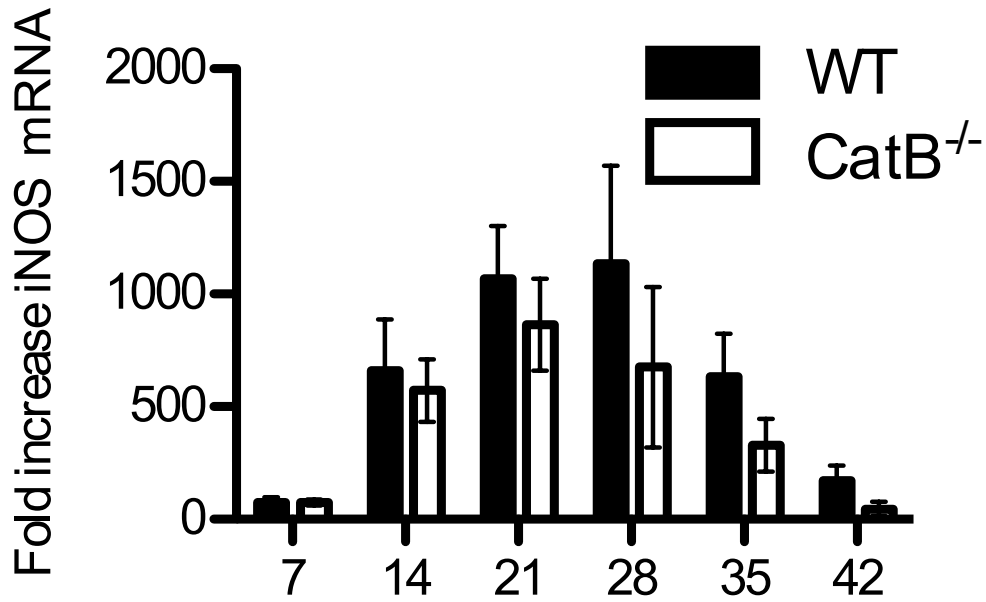**B**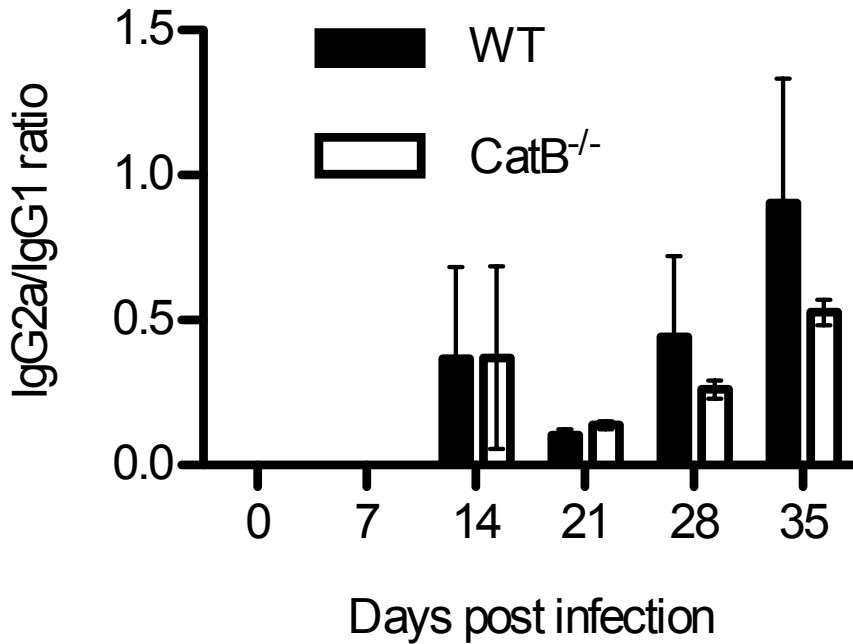

**Supplementary Figure 5 - FP iNOS transcript and IgG2a/IgG1 antibody ratio.**

a) iNOS mRNAs expression was by RT PCR in footpads of WT and CatB mice after infection with *L. major*

b) Ratio of seric IgG2a and IgG1 from WT and CatB mice infected with *L. major*
