# Supplementary material for: Cathepsin B-Deficient Mice Resolve Leishmania major Inflammation Faster in a T Cell-Dependent Manner
Source: PubMed Central journal article supplement (PMC4868322; doi:10.1371/journal.pntd.0004716), 2016-05-16
Supplement: pntd.0004716.s006.pdf [file pntd.0004716.s006.pdf]

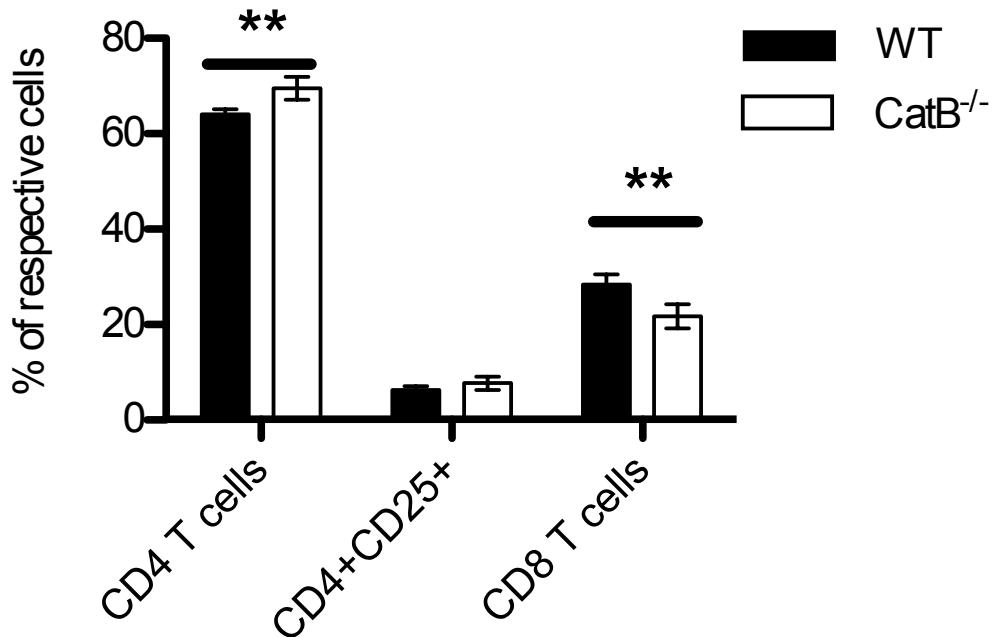

**Supplementary Figure 6 - Cell composition in naive spleens of WT and CatB<sup>-/-</sup> mice.**

Splenocytes from naive WT and Cat<sup>-/-</sup> mice were stained for CD4, CD25 and CD8 before purification of CD3 cells for adoptive transfers. Representative data of 2 experiments with n=4 mice per group. Values are shown as mean ± SEM.
